# Supplementary material
Source: MDPI journal article supplement (https://www.mdpi.com/2073-4352/14/3/287)
Supplement: s1 [file s1]

TABLE S1

Variant classification, Habit plane (HP), Shape deformation direction (SD), magnitude of shear (m) for solutions 1 and 3 of the PTMC with a LIS by slip  $\{113\}_\gamma \langle 110 \rangle_\gamma$ .

(for Solution 1:  $h=0.82193, k=0.44004, l=0.36165, u=0.838, v=0.39001, w=0.38165$  and  $m=0.36$ )

(for Solution 3:  $h=0.823, k=0.40899, l=0.3942, u=0.75246, v=0.65314, w=0.08488$  and  $m=1.66$ )

| CV                                                                                      | Variant Number | Closest KS variant                                                                                                     | LIS                                                                                      | HP s1,s3                   | SD s1                      | SD s3                      |
|-----------------------------------------------------------------------------------------|----------------|------------------------------------------------------------------------------------------------------------------------|------------------------------------------------------------------------------------------|----------------------------|----------------------------|----------------------------|
| <b>CV1</b><br>$\begin{bmatrix} 0 & 1 & \bar{1} \\ 0 & 1 & 1 \\ 1 & 0 & 0 \end{bmatrix}$ | $V_{18}$       | $(\bar{1}\bar{1}1)_\gamma // (\bar{1}10)_\alpha$<br>$[\bar{1}10]_\gamma // [11\bar{1}]_\alpha$                         | $(113)_\gamma [\bar{1}10]_\gamma$<br>$(\bar{1}\bar{1}3)_\gamma [\bar{1}10]_\gamma$       | $(\bar{k}lh)_\gamma$       | $(u\bar{w}v)_\gamma$       | $(u\bar{v}w)_\gamma$       |
|                                                                                         | $V_{15}$       | $(111)_\gamma // (\bar{1}10)_\alpha$<br>$[\bar{1}10]_\gamma // [\bar{1}\bar{1}\bar{1}]_\alpha$                         | $(113)_\gamma [\bar{1}10]_\gamma$<br>$(113)_\gamma [\bar{1}10]_\gamma$                   | $(\bar{k}l\bar{h})_\gamma$ | $(u\bar{w}\bar{v})_\gamma$ | $(u\bar{v}\bar{w})_\gamma$ |
|                                                                                         | $V_{24}$       | $(1\bar{1}1)_\gamma // (\bar{1}\bar{1}0)_\alpha$<br>$[\bar{1}\bar{1}0]_\gamma // [\bar{1}\bar{1}\bar{1}]_\alpha$       | $(\bar{1}\bar{1}3)_\gamma [110]_\gamma$<br>$(\bar{1}\bar{1}\bar{3})_\gamma [110]_\gamma$ | $(k\bar{l}h)_\gamma$       | $(\bar{u}wv)_\gamma$       | $(\bar{u}v\bar{w})_\gamma$ |
|                                                                                         | $V_{21}$       | $(\bar{1}11)_\gamma // (110)_\alpha$<br>$[110]_\gamma // [\bar{1}\bar{1}\bar{1}]_\alpha$                               | $(\bar{1}\bar{1}3)_\gamma [110]_\gamma$<br>$(\bar{1}\bar{1}3)_\gamma [110]_\gamma$       | $(k\bar{l}h)_\gamma$       | $(\bar{u}w\bar{v})_\gamma$ | $(\bar{u}v\bar{w})_\gamma$ |
|                                                                                         | $V_{11}$       | $(1\bar{1}1)_\gamma // (\bar{1}01)_\alpha$<br>$[\bar{1}01]_\gamma // [\bar{1}\bar{1}\bar{1}]_\alpha$                   | $(131)_\gamma [\bar{1}01]_\gamma$<br>$(\bar{1}\bar{3}1)_\gamma [\bar{1}01]_\gamma$       | $(\bar{k}h\bar{l})_\gamma$ | $(u\bar{v}\bar{w})_\gamma$ | $(u\bar{w}\bar{v})_\gamma$ |
|                                                                                         | $V_2$          | $(111)_\gamma // (\bar{1}01)_\alpha$<br>$[\bar{1}01]_\gamma // [\bar{1}\bar{1}\bar{1}]_\alpha$                         | $(\bar{1}\bar{3}1)_\gamma [\bar{1}01]_\gamma$<br>$(131)_\gamma [\bar{1}01]_\gamma$       | $(\bar{k}h\bar{l})_\gamma$ | $(u\bar{v}\bar{w})_\gamma$ | $(u\bar{w}\bar{v})_\gamma$ |
|                                                                                         | $V_8$          | $(\bar{1}11)_\gamma // (101)_\alpha$<br>$[101]_\gamma // [\bar{1}\bar{1}\bar{1}]_\alpha$                               | $(\bar{1}\bar{3}1)_\gamma [101]_\gamma$<br>$(\bar{1}\bar{3}1)_\gamma [101]_\gamma$       | $(\bar{k}h\bar{l})_\gamma$ | $(u\bar{v}w)_\gamma$       | $(u\bar{w}v)_\gamma$       |
|                                                                                         | $V_5$          | $(\bar{1}\bar{1}1)_\gamma // (101)_\alpha$<br>$[101]_\gamma // [\bar{1}\bar{1}\bar{1}]_\alpha$                         | $(\bar{1}\bar{3}1)_\gamma [101]_\gamma$<br>$(\bar{1}\bar{3}1)_\gamma [101]_\gamma$       | $(\bar{k}h\bar{l})_\gamma$ | $(u\bar{v}w)_\gamma$       | $(u\bar{w}v)_\gamma$       |
| <b>CV2</b><br>$\begin{bmatrix} 1 & 0 & 1 \\ 1 & 0 & \bar{1} \\ 0 & 1 & 0 \end{bmatrix}$ | $V_6$          | $(\bar{1}\bar{1}1)_\gamma // (\bar{1}10)_\alpha$<br>$[\bar{1}10]_\gamma // [11\bar{1}]_\alpha$                         | $(113)_\gamma [\bar{1}10]_\gamma$<br>$(\bar{1}\bar{1}3)_\gamma [\bar{1}10]_\gamma$       | $(\bar{l}kh)_\gamma$       | $(\bar{w}uv)_\gamma$       | $(\bar{v}uw)_\gamma$       |
|                                                                                         | $V_3$          | $(111)_\gamma // (\bar{1}\bar{1}0)_\alpha$<br>$[\bar{1}\bar{1}0]_\gamma // [\bar{1}\bar{1}\bar{1}]_\alpha$             | $(113)_\gamma [\bar{1}10]_\gamma$<br>$(113)_\gamma [\bar{1}10]_\gamma$                   | $(\bar{l}kh)_\gamma$       | $(\bar{w}u\bar{v})_\gamma$ | $(\bar{v}u\bar{w})_\gamma$ |
|                                                                                         | $V_{12}$       | $(1\bar{1}1)_\gamma // (110)_\alpha$<br>$[110]_\gamma // [\bar{1}\bar{1}\bar{1}]_\alpha$                               | $(\bar{1}\bar{1}3)_\gamma [110]_\gamma$<br>$(\bar{1}\bar{1}\bar{3})_\gamma [110]_\gamma$ | $(l\bar{k}h)_\gamma$       | $(wuv)_\gamma$             | $(vuw)_\gamma$             |
|                                                                                         | $V_9$          | $(\bar{1}11)_\gamma // (\bar{1}\bar{1}0)_\alpha$<br>$[\bar{1}\bar{1}0]_\gamma // [\bar{1}\bar{1}\bar{1}]_\alpha$       | $(\bar{1}\bar{1}3)_\gamma [110]_\gamma$<br>$(\bar{1}\bar{1}3)_\gamma [110]_\gamma$       | $(l\bar{k}h)_\gamma$       | $(w\bar{u}\bar{v})_\gamma$ | $(v\bar{u}\bar{w})_\gamma$ |
|                                                                                         | $V_{19}$       | $(\bar{1}\bar{1}1)_\gamma // (0\bar{1}1)_\alpha$<br>$[0\bar{1}1]_\gamma // [\bar{1}\bar{1}\bar{1}]_\alpha$             | $(311)_\gamma [0\bar{1}1]_\gamma$<br>$(\bar{3}11)_\gamma [0\bar{1}1]_\gamma$             | $(h\bar{k}l)_\gamma$       | $(v\bar{u}\bar{w})_\gamma$ | $(w\bar{u}\bar{v})_\gamma$ |
|                                                                                         | $V_{13}$       | $(111)_\gamma // (0\bar{1}1)_\alpha$<br>$[0\bar{1}1]_\gamma // [\bar{1}\bar{1}\bar{1}]_\alpha$                         | $(\bar{3}11)_\gamma [0\bar{1}1]_\gamma$<br>$(311)_\gamma [0\bar{1}1]_\gamma$             | $(h\bar{k}l)_\gamma$       | $(\bar{v}u\bar{w})_\gamma$ | $(\bar{w}u\bar{v})_\gamma$ |
|                                                                                         | $V_{16}$       | $(\bar{1}\bar{1}1)_\gamma // (011)_\alpha$<br>$[011]_\gamma // [\bar{1}\bar{1}\bar{1}]_\alpha$                         | $(3\bar{1}1)_\gamma [011]_\gamma$<br>$(\bar{3}\bar{1}1)_\gamma [011]_\gamma$             | $(hkl)_\gamma$             | $(v\bar{w}\bar{u})_\gamma$ | $(w\bar{u}\bar{v})_\gamma$ |
|                                                                                         | $V_{22}$       | $(1\bar{1}1)_\gamma // (011)_\alpha$<br>$[011]_\gamma // [\bar{1}\bar{1}\bar{1}]_\alpha$                               | $(3\bar{1}1)_\gamma [011]_\gamma$<br>$(3\bar{1}1)_\gamma [011]_\gamma$                   | $(hkl)_\gamma$             | $(\bar{v}w\bar{u})_\gamma$ | $(\bar{w}u\bar{v})_\gamma$ |
| <b>CV3</b><br>$\begin{bmatrix} 1 & \bar{1} & 0 \\ 1 & 1 & 0 \\ 0 & 0 & 1 \end{bmatrix}$ | $V_{23}$       | $(1\bar{1}1)_\gamma // (10\bar{1})_\alpha$<br>$[10\bar{1}]_\gamma // [\bar{1}\bar{1}\bar{1}]_\alpha$                   | $(131)_\gamma [10\bar{1}]_\gamma$<br>$(\bar{1}\bar{3}1)_\gamma [10\bar{1}]_\gamma$       | $(\bar{l}h\bar{k})_\gamma$ | $(\bar{w}vu)_\gamma$       | $(\bar{v}wu)_\gamma$       |
|                                                                                         | $V_{14}$       | $(111)_\gamma // (10\bar{1})_\alpha$<br>$[10\bar{1}]_\gamma // [\bar{1}\bar{1}\bar{1}]_\alpha$                         | $(\bar{1}\bar{3}1)_\gamma [10\bar{1}]_\gamma$<br>$(131)_\gamma [10\bar{1}]_\gamma$       | $(\bar{l}h\bar{k})_\gamma$ | $(\bar{w}\bar{v}u)_\gamma$ | $(\bar{v}\bar{w}u)_\gamma$ |
|                                                                                         | $V_{20}$       | $(\bar{1}11)_\gamma // (\bar{1}0\bar{1})_\alpha$<br>$[\bar{1}0\bar{1}]_\gamma // [\bar{1}\bar{1}\bar{1}]_\alpha$       | $(1\bar{3}1)_\gamma [101]_\gamma$<br>$(\bar{1}\bar{3}1)_\gamma [101]_\gamma$             | $(\bar{l}hk)_\gamma$       | $(\bar{w}v\bar{u})_\gamma$ | $(\bar{v}w\bar{u})_\gamma$ |
|                                                                                         | $V_{17}$       | $(\bar{1}\bar{1}1)_\gamma // (\bar{1}0\bar{1})_\alpha$<br>$[\bar{1}0\bar{1}]_\gamma // [\bar{1}\bar{1}\bar{1}]_\alpha$ | $(1\bar{3}1)_\gamma [101]_\gamma$<br>$(1\bar{3}1)_\gamma [101]_\gamma$                   | $(\bar{l}hk)_\gamma$       | $(\bar{w}v\bar{u})_\gamma$ | $(\bar{v}w\bar{u})_\gamma$ |

|  |          |                                                                                                                        |                                                                                          |                            |                      |                      |
|--|----------|------------------------------------------------------------------------------------------------------------------------|------------------------------------------------------------------------------------------|----------------------------|----------------------|----------------------|
|  | $V_7$    | $(\bar{1}11)_\gamma // (0\bar{1}\bar{1})_\alpha$<br>$[0\bar{1}\bar{1}]_\gamma // [\bar{1}\bar{1}\bar{1}]_\alpha$       | $(311)_\gamma [0\bar{1}\bar{1}]_\gamma$<br>$(\bar{3}11)_\gamma [0\bar{1}\bar{1}]_\gamma$ | $(h\bar{l}\bar{k})_\gamma$ | $(v\bar{w}u)_\gamma$ | $(w\bar{v}u)_\gamma$ |
|  | $V_1$    | $(111)_\gamma // (0\bar{1}\bar{1})_\alpha$<br>$[0\bar{1}\bar{1}]_\gamma // [\bar{1}\bar{1}\bar{1}]_\alpha$             | $(\bar{3}11)_\gamma [0\bar{1}\bar{1}]_\gamma$<br>$(311)_\gamma [0\bar{1}\bar{1}]_\gamma$ | $(\bar{h}l\bar{k})_\gamma$ | $(\bar{v}wu)_\gamma$ | $(\bar{w}vu)_\gamma$ |
|  | $V_4$    | $(\bar{1}\bar{1}1)_\gamma // (0\bar{1}\bar{1})_\alpha$<br>$[0\bar{1}\bar{1}]_\gamma // [\bar{1}\bar{1}\bar{1}]_\alpha$ | $(\bar{3}\bar{1}1)_\gamma [011]_\gamma$<br>$(\bar{3}\bar{1}1)_\gamma [011]_\gamma$       | $(h\bar{l}\bar{k})_\gamma$ | $(v\bar{w}u)_\gamma$ | $(w\bar{v}u)_\gamma$ |
|  | $V_{10}$ | $(1\bar{1}1)_\gamma // (0\bar{1}\bar{1})_\alpha$<br>$[0\bar{1}\bar{1}]_\gamma // [\bar{1}\bar{1}\bar{1}]_\alpha$       | $(\bar{3}\bar{1}1)_\gamma [011]_\gamma$<br>$(\bar{3}\bar{1}1)_\gamma [011]_\gamma$       | $(\bar{h}l\bar{k})_\gamma$ | $(\bar{v}wu)_\gamma$ | $(\bar{w}vu)_\gamma$ |

**FIGURE S1**

Figure S1a shows the IQ + IPF map of the area enclosed in area 2 in Figure 1a. Martensite pixels inside the matrix and twinned area are highlighted in blue and red, respectively. Misorientation calculations show that the twinned area is within  $1^\circ$  from the variant  $V_1$  of the ORs of solution 1 and 3, respectively. Similar calculations show that the matrix area is within  $1.5^\circ$  from the variant  $V_{13}$  of the same ORs. Referring to TABLE S1, if  $V_1$  corresponds to solution 1, its correspondence variant (CV) is CV3 and its associated LIS is on  $(\bar{3}11)_\gamma [0\bar{1}\bar{1}]_\gamma$  while if it corresponds to solution 3, it has the same CV3 but a different LIS on  $(311)_\gamma [0\bar{1}\bar{1}]_\gamma$ . According to CV3, the  $(\bar{3}11)_\gamma$  and  $(311)_\gamma$  planes originate from  $(\bar{2}\bar{1}1)_\alpha$  and  $(121)_\alpha$ , respectively. Similarly, if  $V_{13}$  corresponds to solution 1, it comes from CV2 and its LIS is on  $(\bar{3}11)_\gamma [0\bar{1}\bar{1}]_\gamma$ , while if it corresponds to solution 3, it has the same CV3 but a different LIS on  $(311)_\gamma [0\bar{1}\bar{1}]_\gamma$ . According to CV3, the  $(\bar{3}11)_\gamma$  and  $(311)_\gamma$  planes originate from  $(\bar{1}21)_\alpha$  and  $(211)_\alpha$ , respectively. It is then a priori possible to distinguish between solution 1 and 3 by measuring the relative orientation of the  $(311)_\gamma$  and  $(\bar{3}11)_\gamma$  planes with respect to the  $\{112\}_\alpha$  poles of variants  $V_1$  and  $V_{13}$ .

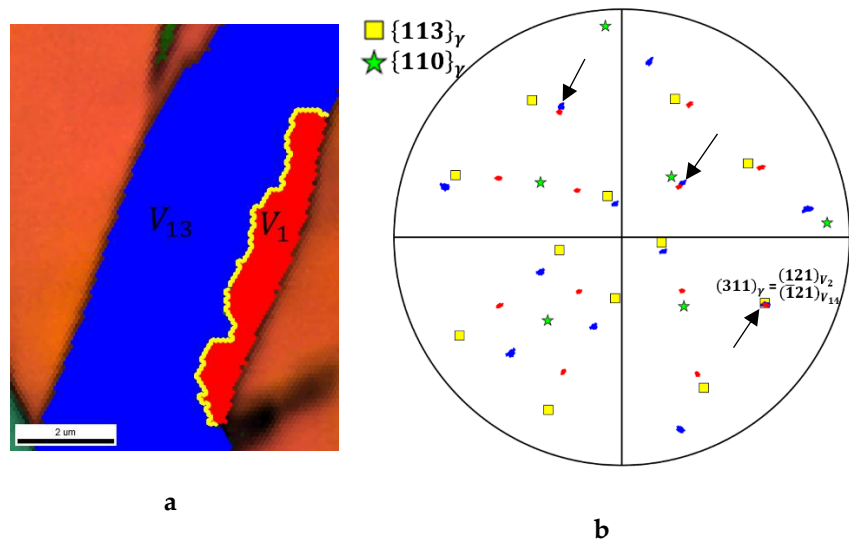

**Figure S1.** a) IQ + IPF map of area 2 in Figure 1a. The matrix and twin orientations are highlighted in blue and red, respectively, b)  $\{112\}_\alpha$  pole figure of variants  $V_1$  (red points) and  $V_{13}$  (blue points) in Figure S1.a together with the  $\{110\}_\gamma$  and  $\{113\}_\gamma$  of the parent austenite.

Figure S1b is the experimental  $\{112\}_\alpha$  pole figure of variants  $V_1$  (red points) and  $V_{13}$  (blue points) shown in Figure S1a. Three  $\{112\}_\alpha$  poles are in common between the two variants, as expected for twin related crystals on the  $\{112\}_\alpha \langle 111 \rangle_\alpha$  system. These poles are indicated by black arrows in Figure S1b. The  $\{110\}_\gamma$  and  $\{113\}_\gamma$  pole figures of the parent austenite are superimposed as yellow squares

and green stars, respectively. It can be seen that none of the  $\{110\}_\gamma$  poles are parallel to any of the three common  $\{112\}_\alpha$  poles. This tends to confirm that the LIS of  $\{225\}_\gamma$  martensite does not correspond to a  $\{110\}_\gamma\langle 110\rangle_\gamma$  system. On the contrary, the  $(311)_\gamma$  pole is strictly parallel to the common poles  $(121)_{V_2}/(\bar{1}21)_{V_{14}}$ . Hence, a complete agreement with the experiments is obtained when considering that  $V_1$  and  $V_{13}$  are variants of the solution 3 of the PTMC with a LIS on  $(311)_\gamma[0\bar{1}1]_\gamma$ .
